# Supplementary material for: Exogenous Melatonin Promotes the Salt Tolerance by Removing Active Oxygen and Maintaining Ion Balance in Wheat (Triticum aestivum L.)
Source: Front Plant Sci. 2022 Jan 31;12:787062. doi: 10.3389/fpls.2021.787062 (PMC8841648; doi:10.3389/fpls.2021.787062)
Supplement: Supplementary file 1 [file Data_Sheet_1.xlsx]

## Sheet: Sheet4
	TABLE S1 The amino acid content of wheat seedlings under different treatments.
	Root and leaf	Cultivar	Treatment	Asp	Glu	His	Ser	Arg	Gly	Thr	Pro	Ala	Val	Met	Cys	Ile	Leu	Phe	Lys	Tyr
	Root	JM22	CK	7.97006	13.183	1.3597	4.7437	4.67416	5.3059	4.2815	4.53545	7.76233	5.52616	0.886699	0.113694	3.78784	6.95743	3.59509	0.666102	0.0135304
			NaCl	11.1351	18.7203	1.84033	5.98927	6.18743	6.53251	5.34333	5.67588	9.85791	6.90635	0.794759	0.0264231	4.75088	8.84915	4.5466	2.04829	0.049573
			NaCl+MT	9.60259	14.7334	1.75598	5.7393	5.78925	6.15242	5.33433	5.31667	8.72633	6.47436	0.359606	0.0928022	4.37657	8.38933	4.34105	1.05995	0.0366758
		SM15	CK	5.44534	10.0973	1.08869	4.01603	4.30054	4.50627	3.62677	4.08554	5.66349	4.34575	0.547592	0.0258656	2.79994	5.12989	2.57711	0.285383	0.0245189
			NaCl	7.46936	12.8736	1.40141	4.83997	4.99237	5.46827	4.32978	4.79867	7.22751	5.57932	0.724924	0.016382	3.82093	6.90905	3.57561	0.96712	0.0402346
			NaCl+MT	2.64842	9.90217	1.13611	3.74719	4.16907	4.80706	3.29775	4.16561	5.77892	4.55764	0.634242	0.0276995	3.11491	5.55143	2.86001	0.82259	0.02451
		ZM18	CK	6.86821	11.9411	1.08261	4.3424	4.6035	5.08092	4.13569	4.26688	6.82685	5.39653	0.625887	0.0843046	3.69803	6.58481	3.43263	1.49859	0.0480924
			NaCl	8.08699	13.5202	1.28392	5.00223	5.42538	5.63427	4.49367	4.74007	8.57017	6.08452	0.740195	0.0188527	4.17003	7.44554	3.8772	2.12108	0.0950253
			NaCl+MT	7.99244	13.7593	1.24818	4.90069	5.27309	5.57188	4.56815	4.75133	7.7894	5.99749	0.589544	0.0701438	4.21189	7.4552	3.88293	1.93614	0.0977457
	Leaf	JM22	CK	9.11577	18.4964	0.655946	7.41149	9.5112	9.74761	7.70175	9.40497	11.1516	10.0819	0.890457	0.277171	7.56745	13.933	9.45157	3.56983	0.344668
			NaCl	16.989	23.3366	3.9569	9.91129	12.5917	11.554	10.8142	10.2498	14.6736	12.0632	1.29137	0.320282	8.49879	16.0618	9.57079	3.94964	0.349089
			NaCl+MT	16.9524	25.1622	3.78376	9.58145	11.7248	11.2595	10.259	9.41528	14.9549	12.158	1.18847	0.542386	8.78436	16.2618	9.84544	4.25442	0.374696
		SM15	CK	8.27481	13.0175	0.875558	4.83255	6.08036	5.90622	5.09042	4.97843	7.58133	5.90732	0.439163	0.178982	4.21223	8.14761	4.70291	2.85675	0.341017
			NaCl	12.9364	20.0569	1.68409	7.94243	10.0684	10.0074	8.54292	8.784	12.2077	10.1683	0.943499	0.322412	7.342	13.9339	8.44658	3.8292	0.401311
			NaCl+MT	9.64515	13.011	1.99599	5.29341	6.62104	6.11157	5.6897	4.98908	8.21223	5.99825	0.814103	0.0748122	4.14987	8.07873	4.70762	4.70781	0.753156
		ZM18	CK	13.275	18.8237	2.91239	7.74825	9.38934	8.9275	8.13817	7.89101	11.653	9.31338	0.952665	0.500381	6.62039	12.659	7.60537	3.66093	0.282596
			NaCl	17.8595	24.9082	4.10013	10.9101	13.2085	12.3655	11.4683	11.5632	15.5711	13.0998	1.25319	0.609114	9.36629	17.6804	10.9818	5.42743	0.405182
			NaCl+MT	15.9357	22.705	3.56349	9.40685	11.3592	10.7129	9.78377	9.58187	13.7631	11.4507	1.0387	0.58096	8.32383	15.7893	9.71765	6.56547	0.723134
